# Supplementary material for: Current status and grand challenges for small wind turbine technology
Source: Copernicus journal article supplement (doi:10.5194/wes-2022-34), 2022-06-22
Supplement: Supplementary file [file wes-2022-34-AC1-supplement.pdf]

Dear Prof. Clausen,

We would like to thank you for your appreciation of the paper and for the interesting suggestion on DAWTs. Based on your comments, additional data, references, and discussion have been added. Thanks to the additional time available, we have also made a throughout revision of the paper, adding more information and new data, when available.

All modifications and responses to the comments have been highlighted in blue-colored text both in this communication and in the revised version of the paper.

We hope that this revised version can be now worth of publication in *Wind Energy Science*.

Best regards,

*Alessandro Bianchini* on behalf of all the authors.

oooooooooooooooooooo

An excellent review article covering "the state of play" of small wind turbines. Diffuser Augmented Wind Turbines (DAWTs) appear to offer significant performance enhancements over bare wind turbines up to about 2 kW rated capacity. I suggest in this article a little more information on DAWTs and the likely impact this will have on their LCOE.

Thank you for this interesting comment. We agree with the Reviewer that interest in, and commercialization of, small diffuser augmented wind turbines has increased recently. Unfortunately, there does not appear to be any detailed LCOE assessment in the open literature, but the following two references give detailed information on DAWT developments and applications. The description of DAWTs in the manuscript has been extended to include these and the new reference by Visser added.

- Evans, S. P., Kesby, J. E., Bradley, J., & Clausen, P. D. (2020). Commercialization of a diffuser augmented wind turbine for distributed generation. In *Journal of Physics: Conference Series* (Vol. 1452, No. 1, p. 012014). IOP Publishing.
- Visser, K. D. (2022). Real-world development challenges of the Clarkson University 3 meter ducted wind turbine. In *Journal of Physics: Conference Series* (Vol. 2265, No. 4, p. 042072). IOP Publishing.
